# Supplementary material
Source: publisher figshare collection journal article supplement (https://diabetesjournals.figshare.com/articles/dataset/_/21870582)
Supplement: Supplementary file 1 [file 1]

**Supplementary Table S1. Coding used to identify each outcome.**

| <b>Outcome</b>              | <b>1995 to 2001</b>                                                                                                                                                                                                                                                                                             | <b>2002 to 2019</b>                                                                                                                                                                                                                                                                                                                                                                                                        |
|-----------------------------|-----------------------------------------------------------------------------------------------------------------------------------------------------------------------------------------------------------------------------------------------------------------------------------------------------------------|----------------------------------------------------------------------------------------------------------------------------------------------------------------------------------------------------------------------------------------------------------------------------------------------------------------------------------------------------------------------------------------------------------------------------|
| Acute myocardial infarction | ICD-9 codes 410.*                                                                                                                                                                                                                                                                                               | ICD-10 codes I21.* or I22.*                                                                                                                                                                                                                                                                                                                                                                                                |
| Stroke                      | ICD-9 codes 434.* or 436.*                                                                                                                                                                                                                                                                                      | ICD-10 codes I63.* (except I63.6) or I64.*                                                                                                                                                                                                                                                                                                                                                                                 |
| Heart failure               | ICD-9 codes 428.*                                                                                                                                                                                                                                                                                               | ICD-10 codes I50.0, I50.1 or I50.9                                                                                                                                                                                                                                                                                                                                                                                         |
| Lower extremity amputation  | Canadian Classification of Diagnostic, Therapeutic, and Surgical Procedures codes 96.11 to 96.15 excluding hospitalizations with these ICD-9 codes: 170.7, 170.8, 171.3, 213.7, 213.8, 215.3, 820.* to 829.*, 835.* to 838.*, 843.* to 845.*, 895.* to 897.*, 904.*, 928.*, 956.*, 991.2, 991.3, 945.* or 946.* | Canadian Classification of Health Intervention codes 1.VC.93, 1.VG.93, 1.VQ.93, 1.WA.93, 1.WE.93, 1.WI.93, 1.WJ.93, 1.WK.93, 1.WL.93, 1.WM.93 or 1.WN.93 excluding hospitalizations with these ICD-10 codes: C40.2, C40.3, C49.2, D16.2, D16.3, D21.2, S72.* to S79.*, S82.* to S89.*, S92.* to S99.*, T02.* to T09.*, T12.*, T13.2 to T13.9, T14.2 to T14.9, T34.6 to T34.9, T35.0, T35.1, T35.5 to T35.7, T24.* or T25.* |
| Acute appendicitis          | ICD-9 codes 320.*                                                                                                                                                                                                                                                                                               | ICD-10 codes G00.* or G01.*                                                                                                                                                                                                                                                                                                                                                                                                |

ICD-9 = International Classification of Diseases, 9th revision

ICD-10 = International Classification of Diseases, 10th revision

**Supplementary Table S2. Baseline characteristics of the 1995, 2003, 2011 and 2019 cohorts.**  
**Values are N (%) except where indicated.**

| <b>Characteristics</b> | <b>1995</b>     | <b>2003</b>     | <b>2011</b>     | <b>2019</b>     |
|------------------------|-----------------|-----------------|-----------------|-----------------|
| N                      | 280,121         | 529,864         | 884,902         | 1,185,863       |
| Age                    |                 |                 |                 |                 |
| Mean $\pm$ SD          | 60.7 $\pm$ 15.6 | 61.2 $\pm$ 15.4 | 62.7 $\pm$ 15.0 | 64.2 $\pm$ 14.9 |
| 29                     | 11,122 (4.0%)   | 16,467 (3.1%)   | 22,223 (2.5%)   | 28,503 (2.4%)   |
| 30–39                  | 16,175 (5.8%)   | 28,096 (5.3%)   | 34,800 (3.9%)   | 39,836 (3.4%)   |
| 40–49                  | 34,373 (12.3%)  | 67,325 (12.7%)  | 101,097 (11.4%) | 106,659 (9.0%)  |
| 50–59                  | 54,274 (19.4%)  | 115,412 (21.8%) | 188,645 (21.3%) | 236,274 (19.9%) |
| 60–69                  | 76,462 (27.3%)  | 128,275 (24.2%) | 235,028 (26.6%) | 319,612 (27.0%) |
| 70–79                  | 62,219 (22.2%)  | 119,354 (22.5%) | 187,402 (21.2%) | 281,253 (23.7%) |
| 80+                    | 25,496 (9.1%)   | 54,935 (10.4%)  | 115,707 (13.1%) | 173,726 (14.6%) |
| Sex                    |                 |                 |                 |                 |
| Male                   | 146,024 (52.1%) | 279,743 (52.8%) | 467,399 (52.8%) | 632,570 (53.3%) |
| Female                 | 134,097 (47.9%) | 250,121 (47.2%) | 417,503 (47.2%) | 553,293 (46.7%) |
| Income                 |                 |                 |                 |                 |
| Lowest                 | 68,359 (24.4%)  | 121,200 (22.9%) | 198,673 (22.5%) | 278,951 (23.5%) |
| 2                      | 61,929 (22.1%)  | 117,439 (22.2%) | 190,211 (21.5%) | 257,900 (21.7%) |
| 3                      | 56,571 (20.2%)  | 106,220 (20.0%) | 178,576 (20.2%) | 242,704 (20.5%) |
| 4                      | 48,846 (17.4%)  | 97,535 (18.4%)  | 170,591 (19.3%) | 215,756 (18.2%) |
| Highest                | 43,312 (15.5%)  | 84,811 (16.0%)  | 142,419 (16.1%) | 187,346 (15.8%) |
| Hypertension           | 122,450 (43.7%) | 318,269 (60.1%) | 586,861 (66.3%) | 775,030 (65.4%) |
| COPD                   | 28,477 (10.2%)  | 78,846 (14.9%)  | 143,663 (16.2%) | 191,611 (16.2%) |
| Mental health          | 86,355 (30.8%)  | 151,472 (28.6%) | 211,958 (24.0%) | 249,032 (21.0%) |

**Supplementary Table S3. Hospitalizations per 1000 person-years (with 95% confidence intervals) for cardiovascular disease among people with diagnosed diabetes, 1995 to 2019, stratified by income.**

| Year                               | Income           |                  |                  |                  |                  |
|------------------------------------|------------------|------------------|------------------|------------------|------------------|
|                                    | Lowest           | 2nd              | 3rd              | 4th              | Highest          |
| <b>Acute myocardial infarction</b> |                  |                  |                  |                  |                  |
| 1995                               | 16.2 (15.6-16.9) | 15.6 (15.0-16.2) | 15.3 (14.7-16.0) | 14.8 (14.1-15.5) | 14.8 (14.1-15.6) |
| 1996                               | 16.0 (15.5-16.5) | 15.5 (15.0-16.0) | 15.1 (14.6-15.6) | 14.6 (14.1-15.1) | 14.6 (14.0-15.2) |
| 1997                               | 15.8 (15.4-16.2) | 15.4 (15.0-15.8) | 14.9 (14.5-15.3) | 14.4 (14.0-14.9) | 14.4 (13.9-14.8) |
| 1998                               | 15.6 (15.3-15.9) | 15.3 (15.0-15.7) | 14.7 (14.4-15.1) | 14.2 (13.9-14.6) | 14.1 (13.7-14.5) |
| 1999                               | 15.4 (15.1-15.7) | 15.2 (14.9-15.5) | 14.5 (14.2-14.8) | 14.0 (13.7-14.4) | 13.9 (13.6-14.3) |
| 2000                               | 15.2 (14.9-15.5) | 15.1 (14.8-15.4) | 14.3 (14.0-14.7) | 13.9 (13.5-14.2) | 13.7 (13.3-14.0) |
| 2001                               | 14.9 (14.6-15.3) | 14.9 (14.5-15.2) | 14.0 (13.7-14.4) | 13.6 (13.2-14.0) | 13.4 (13.0-13.8) |
| 2002                               | 14.5 (14.2-14.9) | 14.5 (14.1-14.8) | 13.6 (13.2-13.9) | 13.1 (12.8-13.5) | 12.9 (12.5-13.3) |
| 2003                               | 14.0 (13.7-14.3) | 13.7 (13.4-14.1) | 12.8 (12.5-13.2) | 12.5 (12.1-12.8) | 12.2 (11.8-12.6) |
| 2004                               | 13.3 (13.0-13.5) | 12.7 (12.4-13.0) | 11.9 (11.6-12.2) | 11.6 (11.3-11.9) | 11.3 (11.0-11.6) |
| 2005                               | 12.5 (12.2-12.7) | 11.6 (11.4-11.9) | 10.9 (10.6-11.1) | 10.6 (10.4-10.9) | 10.3 (10.0-10.6) |
| 2006                               | 11.7 (11.4-12.0) | 10.6 (10.3-10.9) | 9.9 (9.7-10.2)   | 9.8 (9.5-10.0)   | 9.4 (9.1-9.7)    |
| 2007                               | 11.0 (10.8-11.3) | 9.8 (9.6-10.1)   | 9.2 (8.9-9.5)    | 9.1 (8.8-9.4)    | 8.7 (8.4-9.0)    |
| 2008                               | 10.6 (10.3-10.8) | 9.4 (9.1-9.6)    | 8.8 (8.5-9.0)    | 8.6 (8.4-8.9)    | 8.2 (8.0-8.5)    |
| 2009                               | 10.2 (10.0-10.4) | 9.1 (8.9-9.3)    | 8.5 (8.3-8.7)    | 8.4 (8.2-8.6)    | 8.0 (7.8-8.2)    |
| 2010                               | 9.9 (9.7-10.1)   | 9.0 (8.8-9.2)    | 8.4 (8.2-8.6)    | 8.2 (8.0-8.4)    | 7.8 (7.6-8.0)    |
| 2011                               | 9.7 (9.5-9.9)    | 8.9 (8.7-9.1)    | 8.3 (8.1-8.5)    | 8.1 (7.9-8.3)    | 7.6 (7.4-7.9)    |
| 2012                               | 9.5 (9.3-9.7)    | 8.7 (8.5-8.9)    | 8.2 (8.0-8.4)    | 7.9 (7.7-8.1)    | 7.5 (7.3-7.7)    |
| 2013                               | 9.3 (9.1-9.5)    | 8.5 (8.4-8.7)    | 8.0 (7.8-8.2)    | 7.7 (7.6-7.9)    | 7.3 (7.2-7.6)    |
| 2014                               | 9.1 (9.0-9.3)    | 8.3 (8.2-8.5)    | 7.9 (7.7-8.0)    | 7.6 (7.4-7.7)    | 7.2 (7.0-7.4)    |
| 2015                               | 8.9 (8.8-9.1)    | 8.1 (8.0-8.3)    | 7.7 (7.6-7.9)    | 7.4 (7.2-7.5)    | 7.0 (6.9-7.2)    |
| 2016                               | 8.8 (8.6-8.9)    | 7.9 (7.8-8.1)    | 7.6 (7.4-7.7)    | 7.2 (7.0-7.3)    | 6.9 (6.7-7.0)    |
| 2017                               | 8.6 (8.4-8.8)    | 7.7 (7.6-7.9)    | 7.4 (7.2-7.6)    | 7.0 (6.8-7.1)    | 6.7 (6.5-6.9)    |
| 2018                               | 8.4 (8.2-8.6)    | 7.5 (7.4-7.7)    | 7.3 (7.1-7.4)    | 6.8 (6.6-7.0)    | 6.6 (6.4-6.8)    |
| 2019                               | 8.3 (8.0-8.5)    | 7.3 (7.1-7.6)    | 7.1 (6.9-7.3)    | 6.6 (6.4-6.9)    | 6.4 (6.2-6.7)    |
| <b>Stroke</b>                      |                  |                  |                  |                  |                  |
| 1995                               | 10.7 (10.2-11.3) | 11.3 (10.8-11.9) | 10.8 (10.3-11.4) | 10.6 (10.1-11.3) | 10.2 (9.6-10.8)  |
| 1996                               | 10.1 (9.8-10.5)  | 10.5 (10.1-10.9) | 10.0 (9.6-10.5)  | 9.8 (9.3-10.2)   | 9.4 (8.9-9.9)    |
| 1997                               | 9.6 (9.3-9.9)    | 9.7 (9.4-10.0)   | 9.3 (8.9-9.6)    | 9.0 (8.6-9.3)    | 8.7 (8.3-9.0)    |
| 1998                               | 9.0 (8.8-9.3)    | 9.0 (8.7-9.2)    | 8.6 (8.3-8.8)    | 8.2 (8.0-8.5)    | 8.0 (7.7-8.3)    |
| 1999                               | 8.5 (8.3-8.7)    | 8.3 (8.1-8.5)    | 7.9 (7.7-8.1)    | 7.5 (7.3-7.8)    | 7.4 (7.2-7.7)    |

|                      |                  |                  |                  |                  |                  |
|----------------------|------------------|------------------|------------------|------------------|------------------|
| 2000                 | 8.0 (7.8-8.3)    | 7.6 (7.4-7.9)    | 7.3 (7.1-7.5)    | 6.9 (6.7-7.2)    | 6.8 (6.6-7.1)    |
| 2001                 | 7.6 (7.3-7.8)    | 7.1 (6.8-7.3)    | 6.7 (6.5-7.0)    | 6.4 (6.1-6.6)    | 6.3 (6.0-6.6)    |
| 2002                 | 7.1 (6.8-7.3)    | 6.5 (6.3-6.8)    | 6.2 (6.0-6.4)    | 5.9 (5.6-6.1)    | 5.8 (5.5-6.1)    |
| 2003                 | 6.5 (6.3-6.8)    | 6.0 (5.8-6.2)    | 5.7 (5.5-5.9)    | 5.4 (5.2-5.6)    | 5.3 (5.1-5.5)    |
| 2004                 | 6.0 (5.8-6.2)    | 5.5 (5.4-5.7)    | 5.2 (5.0-5.3)    | 5.0 (4.8-5.2)    | 4.8 (4.6-5.0)    |
| 2005                 | 5.5 (5.3-5.6)    | 5.1 (4.9-5.2)    | 4.7 (4.5-4.9)    | 4.7 (4.5-4.8)    | 4.4 (4.2-4.6)    |
| 2006                 | 5.0 (4.9-5.2)    | 4.7 (4.5-4.9)    | 4.3 (4.1-4.5)    | 4.4 (4.2-4.5)    | 4.0 (3.8-4.2)    |
| 2007                 | 4.7 (4.5-4.9)    | 4.4 (4.2-4.6)    | 4.0 (3.8-4.2)    | 4.1 (3.9-4.3)    | 3.8 (3.6-3.9)    |
| 2008                 | 4.5 (4.3-4.6)    | 4.2 (4.0-4.3)    | 3.8 (3.7-4.0)    | 3.8 (3.7-4.0)    | 3.6 (3.4-3.7)    |
| 2009                 | 4.3 (4.2-4.5)    | 4.0 (3.8-4.1)    | 3.7 (3.6-3.8)    | 3.6 (3.5-3.7)    | 3.5 (3.3-3.6)    |
| 2010                 | 4.3 (4.2-4.4)    | 3.8 (3.7-4.0)    | 3.6 (3.5-3.7)    | 3.4 (3.3-3.6)    | 3.4 (3.3-3.5)    |
| 2011                 | 4.2 (4.1-4.4)    | 3.8 (3.7-3.9)    | 3.6 (3.4-3.7)    | 3.3 (3.2-3.5)    | 3.4 (3.2-3.5)    |
| 2012                 | 4.2 (4.1-4.4)    | 3.8 (3.6-3.9)    | 3.6 (3.4-3.7)    | 3.3 (3.2-3.4)    | 3.4 (3.2-3.5)    |
| 2013                 | 4.3 (4.1-4.4)    | 3.8 (3.7-3.9)    | 3.6 (3.4-3.7)    | 3.3 (3.2-3.4)    | 3.3 (3.2-3.5)    |
| 2014                 | 4.3 (4.2-4.4)    | 3.8 (3.7-3.9)    | 3.6 (3.5-3.7)    | 3.3 (3.2-3.4)    | 3.3 (3.2-3.4)    |
| 2015                 | 4.3 (4.2-4.4)    | 3.9 (3.8-4.0)    | 3.6 (3.5-3.7)    | 3.4 (3.3-3.5)    | 3.3 (3.2-3.4)    |
| 2016                 | 4.4 (4.3-4.5)    | 4.0 (3.9-4.1)    | 3.7 (3.6-3.8)    | 3.4 (3.3-3.5)    | 3.3 (3.2-3.4)    |
| 2017                 | 4.4 (4.3-4.5)    | 4.0 (3.9-4.1)    | 3.7 (3.6-3.8)    | 3.5 (3.4-3.6)    | 3.3 (3.2-3.4)    |
| 2018                 | 4.4 (4.3-4.6)    | 4.1 (4.0-4.2)    | 3.7 (3.6-3.9)    | 3.5 (3.4-3.7)    | 3.3 (3.1-3.4)    |
| 2019                 | 4.5 (4.3-4.6)    | 4.2 (4.0-4.3)    | 3.8 (3.6-3.9)    | 3.6 (3.4-3.8)    | 3.3 (3.1-3.4)    |
| <b>Heart failure</b> |                  |                  |                  |                  |                  |
| 1995                 | 32.6 (31.6-33.6) | 30.4 (29.4-31.3) | 30.0 (29.0-31.0) | 28.5 (27.4-29.5) | 27.6 (26.5-28.7) |
| 1996                 | 31.6 (30.9-32.4) | 29.6 (28.9-30.4) | 29.0 (28.2-29.8) | 27.5 (26.6-28.3) | 26.8 (25.9-27.7) |
| 1997                 | 30.7 (30.1-31.4) | 28.9 (28.3-29.6) | 28.1 (27.4-28.7) | 26.5 (25.9-27.2) | 26.0 (25.3-26.7) |
| 1998                 | 29.8 (29.3-30.4) | 28.2 (27.7-28.8) | 27.2 (26.6-27.7) | 25.6 (25.1-26.2) | 25.2 (24.6-25.8) |
| 1999                 | 29.0 (28.5-29.5) | 27.5 (27.1-28.0) | 26.3 (25.8-26.8) | 24.7 (24.3-25.2) | 24.5 (23.9-25.0) |
| 2000                 | 28.1 (27.6-28.6) | 26.9 (26.4-27.3) | 25.4 (24.9-25.9) | 23.9 (23.4-24.4) | 23.7 (23.2-24.3) |
| 2001                 | 27.2 (26.6-27.7) | 26.0 (25.5-26.5) | 24.4 (23.9-25.0) | 23.0 (22.4-23.5) | 22.8 (22.3-23.4) |
| 2002                 | 26.0 (25.5-26.5) | 24.9 (24.3-25.4) | 23.3 (22.7-23.8) | 21.9 (21.3-22.4) | 21.8 (21.2-22.4) |
| 2003                 | 24.5 (24.0-25.0) | 23.3 (22.9-23.8) | 21.8 (21.4-22.3) | 20.6 (20.1-21.1) | 20.4 (19.8-20.9) |
| 2004                 | 22.7 (22.3-23.1) | 21.4 (21.0-21.8) | 20.1 (19.7-20.5) | 19.2 (18.8-19.6) | 18.7 (18.2-19.1) |
| 2005                 | 20.9 (20.5-21.3) | 19.4 (19.1-19.8) | 18.4 (18.0-18.8) | 17.7 (17.3-18.1) | 17.0 (16.6-17.4) |
| 2006                 | 19.3 (19.0-19.7) | 17.7 (17.4-18.1) | 16.9 (16.5-17.3) | 16.4 (16.0-16.8) | 15.5 (15.1-15.9) |
| 2007                 | 18.2 (17.8-18.6) | 16.5 (16.1-16.9) | 15.8 (15.4-16.2) | 15.5 (15.1-15.9) | 14.5 (14.1-14.9) |
| 2008                 | 17.6 (17.2-17.9) | 15.9 (15.6-16.3) | 15.2 (14.9-15.6) | 15.0 (14.6-15.3) | 14.0 (13.6-14.3) |
| 2009                 | 17.3 (17.0-17.6) | 15.7 (15.4-16.0) | 15.0 (14.7-15.3) | 14.7 (14.4-15.0) | 13.8 (13.5-14.1) |
| 2010                 | 17.3 (17.1-17.6) | 15.8 (15.5-16.1) | 14.9 (14.6-15.2) | 14.6 (14.3-14.9) | 13.8 (13.5-14.1) |

|                                   |                  |                  |                  |                  |                  |
|-----------------------------------|------------------|------------------|------------------|------------------|------------------|
| 2011                              | 17.5 (17.2-17.8) | 16.0 (15.7-16.3) | 14.9 (14.6-15.2) | 14.6 (14.3-14.9) | 13.9 (13.6-14.2) |
| 2012                              | 17.7 (17.4-18.0) | 16.2 (15.9-16.5) | 15.0 (14.7-15.3) | 14.6 (14.2-14.9) | 13.9 (13.6-14.2) |
| 2013                              | 17.9 (17.6-18.2) | 16.3 (16.0-16.6) | 14.9 (14.7-15.2) | 14.5 (14.2-14.8) | 13.8 (13.5-14.2) |
| 2014                              | 18.2 (17.9-18.4) | 16.4 (16.2-16.7) | 14.9 (14.7-15.2) | 14.4 (14.2-14.7) | 13.7 (13.5-14.0) |
| 2015                              | 18.4 (18.2-18.7) | 16.5 (16.3-16.7) | 14.9 (14.7-15.1) | 14.3 (14.1-14.6) | 13.6 (13.4-13.8) |
| 2016                              | 18.7 (18.4-18.9) | 16.6 (16.4-16.8) | 14.9 (14.6-15.1) | 14.2 (14.0-14.5) | 13.5 (13.2-13.7) |
| 2017                              | 18.9 (18.7-19.2) | 16.7 (16.5-17.0) | 14.8 (14.6-15.1) | 14.2 (13.9-14.4) | 13.3 (13.1-13.6) |
| 2018                              | 19.2 (18.9-19.5) | 16.8 (16.5-17.1) | 14.8 (14.5-15.1) | 14.1 (13.8-14.4) | 13.2 (12.9-13.5) |
| 2019                              | 19.4 (19.1-19.8) | 16.9 (16.5-17.3) | 14.8 (14.4-15.1) | 14.0 (13.6-14.4) | 13.1 (12.7-13.5) |
| <b>Lower extremity amputation</b> |                  |                  |                  |                  |                  |
| 1995                              | 4.5 (4.2-4.9)    | 4.7 (4.3-5.1)    | 4.4 (4.0-4.8)    | 4.3 (4.0-4.8)    | 4.2 (3.8-4.7)    |
| 1996                              | 4.4 (4.1-4.7)    | 4.5 (4.2-4.8)    | 4.2 (3.9-4.5)    | 4.1 (3.8-4.4)    | 4.0 (3.7-4.3)    |
| 1997                              | 4.3 (4.1-4.5)    | 4.3 (4.0-4.5)    | 4.1 (3.8-4.3)    | 3.9 (3.7-4.2)    | 3.8 (3.5-4.0)    |
| 1998                              | 4.2 (4.0-4.4)    | 4.1 (3.9-4.3)    | 3.9 (3.7-4.1)    | 3.7 (3.5-3.9)    | 3.6 (3.4-3.8)    |
| 1999                              | 4.1 (3.9-4.3)    | 3.9 (3.7-4.0)    | 3.8 (3.6-4.0)    | 3.5 (3.4-3.7)    | 3.4 (3.2-3.6)    |
| 2000                              | 4.0 (3.8-4.2)    | 3.7 (3.5-3.9)    | 3.6 (3.5-3.8)    | 3.4 (3.2-3.5)    | 3.2 (3.0-3.4)    |
| 2001                              | 3.9 (3.7-4.1)    | 3.5 (3.3-3.7)    | 3.5 (3.3-3.7)    | 3.2 (3.0-3.4)    | 3.0 (2.8-3.2)    |
| 2002                              | 3.8 (3.6-3.9)    | 3.3 (3.1-3.5)    | 3.3 (3.1-3.5)    | 3.0 (2.8-3.2)    | 2.8 (2.6-3.0)    |
| 2003                              | 3.6 (3.4-3.8)    | 3.1 (3.0-3.3)    | 3.1 (2.9-3.3)    | 2.8 (2.6-3.0)    | 2.6 (2.4-2.8)    |
| 2004                              | 3.4 (3.2-3.5)    | 2.9 (2.8-3.0)    | 2.8 (2.7-2.9)    | 2.6 (2.5-2.8)    | 2.4 (2.3-2.6)    |
| 2005                              | 3.2 (3.0-3.3)    | 2.7 (2.6-2.8)    | 2.5 (2.4-2.7)    | 2.4 (2.3-2.6)    | 2.2 (2.1-2.4)    |
| 2006                              | 3.0 (2.8-3.1)    | 2.5 (2.4-2.7)    | 2.3 (2.2-2.4)    | 2.2 (2.1-2.4)    | 2.1 (1.9-2.2)    |
| 2007                              | 2.8 (2.7-3.0)    | 2.4 (2.2-2.5)    | 2.1 (2.0-2.2)    | 2.1 (2.0-2.2)    | 1.9 (1.8-2.1)    |
| 2008                              | 2.7 (2.6-2.9)    | 2.2 (2.1-2.4)    | 2.0 (1.9-2.1)    | 2.0 (1.8-2.1)    | 1.8 (1.7-2.0)    |
| 2009                              | 2.7 (2.6-2.8)    | 2.2 (2.1-2.3)    | 1.9 (1.8-2.0)    | 1.9 (1.8-2.0)    | 1.8 (1.7-1.9)    |
| 2010                              | 2.6 (2.5-2.8)    | 2.1 (2.0-2.2)    | 1.8 (1.8-1.9)    | 1.8 (1.7-1.9)    | 1.7 (1.6-1.8)    |
| 2011                              | 2.6 (2.5-2.8)    | 2.1 (2.0-2.2)    | 1.8 (1.7-1.9)    | 1.7 (1.6-1.8)    | 1.7 (1.6-1.8)    |
| 2012                              | 2.7 (2.5-2.8)    | 2.1 (2.0-2.2)    | 1.8 (1.7-1.9)    | 1.7 (1.6-1.8)    | 1.7 (1.6-1.8)    |
| 2013                              | 2.7 (2.6-2.8)    | 2.1 (2.0-2.2)    | 1.8 (1.8-1.9)    | 1.7 (1.6-1.8)    | 1.7 (1.6-1.8)    |
| 2014                              | 2.7 (2.6-2.8)    | 2.1 (2.0-2.2)    | 1.9 (1.8-2.0)    | 1.7 (1.6-1.8)    | 1.7 (1.6-1.7)    |
| 2015                              | 2.7 (2.6-2.8)    | 2.1 (2.0-2.2)    | 1.9 (1.8-2.0)    | 1.7 (1.6-1.8)    | 1.6 (1.6-1.7)    |
| 2016                              | 2.8 (2.7-2.8)    | 2.1 (2.1-2.2)    | 1.9 (1.9-2.0)    | 1.7 (1.7-1.8)    | 1.6 (1.6-1.7)    |
| 2017                              | 2.8 (2.7-2.9)    | 2.2 (2.1-2.3)    | 2.0 (1.9-2.1)    | 1.7 (1.6-1.8)    | 1.6 (1.5-1.7)    |
| 2018                              | 2.8 (2.7-2.9)    | 2.2 (2.1-2.3)    | 2.0 (1.9-2.1)    | 1.7 (1.6-1.9)    | 1.6 (1.5-1.7)    |
| 2019                              | 2.8 (2.7-3.0)    | 2.2 (2.1-2.4)    | 2.0 (1.9-2.2)    | 1.8 (1.6-1.9)    | 1.6 (1.5-1.7)    |

**Supplementary Table S4. Hospitalizations per 1000 person-years (with 95% confidence intervals) for cardiovascular disease among people with diagnosed diabetes, 1995 to 2019, stratified by sex.**

| Year                               | Sex              |                  |
|------------------------------------|------------------|------------------|
|                                    | Male             | Female           |
| <b>Acute myocardial infarction</b> |                  |                  |
| 1995                               | 16.7 (16.3-17.1) | 14.0 (13.6-14.4) |
| 1996                               | 16.5 (16.2-16.9) | 13.8 (13.4-14.1) |
| 1997                               | 16.4 (16.1-16.7) | 13.5 (13.3-13.8) |
| 1998                               | 16.3 (16.1-16.5) | 13.3 (13.1-13.5) |
| 1999                               | 16.2 (16.0-16.4) | 13.1 (12.8-13.3) |
| 2000                               | 16.0 (15.8-16.3) | 12.8 (12.6-13.0) |
| 2001                               | 15.8 (15.6-16.0) | 12.5 (12.3-12.7) |
| 2002                               | 15.4 (15.1-15.6) | 12.1 (11.8-12.3) |
| 2003                               | 14.7 (14.5-14.9) | 11.4 (11.2-11.6) |
| 2004                               | 13.7 (13.5-13.9) | 10.6 (10.4-10.8) |
| 2005                               | 12.6 (12.5-12.8) | 9.8 (9.6-9.9)    |
| 2006                               | 11.6 (11.5-11.8) | 9.0 (8.8-9.1)    |
| 2007                               | 10.9 (10.7-11.1) | 8.3 (8.2-8.5)    |
| 2008                               | 10.4 (10.2-10.6) | 7.9 (7.7-8.0)    |
| 2009                               | 10.1 (10.0-10.2) | 7.6 (7.5-7.7)    |
| 2010                               | 10.0 (9.8-10.1)  | 7.4 (7.2-7.5)    |
| 2011                               | 9.8 (9.7-10.0)   | 7.2 (7.1-7.3)    |
| 2012                               | 9.7 (9.6-9.8)    | 7.0 (6.9-7.1)    |
| 2013                               | 9.6 (9.4-9.7)    | 6.8 (6.7-6.9)    |
| 2014                               | 9.4 (9.3-9.5)    | 6.6 (6.5-6.7)    |
| 2015                               | 9.2 (9.1-9.3)    | 6.4 (6.3-6.5)    |
| 2016                               | 9.1 (9.0-9.2)    | 6.2 (6.2-6.3)    |
| 2017                               | 8.9 (8.8-9.0)    | 6.1 (6.0-6.2)    |
| 2018                               | 8.7 (8.6-8.9)    | 5.9 (5.8-6.0)    |
| 2019                               | 8.6 (8.4-8.7)    | 5.7 (5.6-5.9)    |
| <b>Stroke</b>                      |                  |                  |
| 1995                               | 10.9 (10.6-11.3) | 10.6 (10.3-11.0) |
| 1996                               | 10.1 (9.8-10.4)  | 9.9 (9.6-10.2)   |
| 1997                               | 9.3 (9.1-9.6)    | 9.2 (9.0-9.4)    |
| 1998                               | 8.6 (8.5-8.8)    | 8.6 (8.4-8.7)    |
| 1999                               | 8.0 (7.8-8.1)    | 8.0 (7.8-8.1)    |

|                      |                  |                  |
|----------------------|------------------|------------------|
| 2000                 | 7.4 (7.2-7.5)    | 7.4 (7.3-7.6)    |
| 2001                 | 6.8 (6.7-7.0)    | 6.9 (6.7-7.1)    |
| 2002                 | 6.3 (6.2-6.5)    | 6.4 (6.2-6.5)    |
| 2003                 | 5.8 (5.7-6.0)    | 5.8 (5.7-6.0)    |
| 2004                 | 5.4 (5.3-5.5)    | 5.3 (5.2-5.4)    |
| 2005                 | 5.0 (4.8-5.1)    | 4.8 (4.7-5.0)    |
| 2006                 | 4.6 (4.5-4.7)    | 4.4 (4.3-4.6)    |
| 2007                 | 4.3 (4.2-4.4)    | 4.1 (4.0-4.2)    |
| 2008                 | 4.1 (4.0-4.2)    | 3.9 (3.8-4.0)    |
| 2009                 | 3.9 (3.8-4.0)    | 3.7 (3.7-3.8)    |
| 2010                 | 3.8 (3.7-3.9)    | 3.7 (3.6-3.7)    |
| 2011                 | 3.8 (3.7-3.8)    | 3.6 (3.5-3.7)    |
| 2012                 | 3.7 (3.7-3.8)    | 3.6 (3.5-3.7)    |
| 2013                 | 3.8 (3.7-3.8)    | 3.6 (3.5-3.7)    |
| 2014                 | 3.8 (3.7-3.9)    | 3.6 (3.5-3.7)    |
| 2015                 | 3.8 (3.8-3.9)    | 3.6 (3.6-3.7)    |
| 2016                 | 3.9 (3.8-4.0)    | 3.7 (3.6-3.7)    |
| 2017                 | 4.0 (3.9-4.0)    | 3.7 (3.6-3.8)    |
| 2018                 | 4.0 (3.9-4.1)    | 3.7 (3.6-3.8)    |
| 2019                 | 4.1 (4.0-4.2)    | 3.7 (3.6-3.8)    |
| <b>Heart failure</b> |                  |                  |
| 1995                 | 28.8 (28.2-29.4) | 31.0 (30.3-31.7) |
| 1996                 | 28.1 (27.6-28.6) | 30.0 (29.5-30.6) |
| 1997                 | 27.4 (27.0-27.8) | 29.1 (28.6-29.5) |
| 1998                 | 26.7 (26.4-27.1) | 28.1 (27.8-28.5) |
| 1999                 | 26.1 (25.8-26.4) | 27.3 (26.9-27.6) |
| 2000                 | 25.4 (25.1-25.8) | 26.4 (26.0-26.7) |
| 2001                 | 24.7 (24.3-25.0) | 25.4 (25.0-25.8) |
| 2002                 | 23.6 (23.3-24.0) | 24.2 (23.8-24.5) |
| 2003                 | 22.2 (21.9-22.6) | 22.6 (22.3-23.0) |
| 2004                 | 20.5 (20.2-20.8) | 20.8 (20.5-21.1) |
| 2005                 | 18.8 (18.5-19.0) | 19.0 (18.7-19.2) |
| 2006                 | 17.2 (17.0-17.5) | 17.4 (17.1-17.7) |
| 2007                 | 16.1 (15.9-16.4) | 16.2 (15.9-16.5) |
| 2008                 | 15.5 (15.3-15.8) | 15.5 (15.3-15.8) |
| 2009                 | 15.3 (15.1-15.5) | 15.2 (15.0-15.4) |
| 2010                 | 15.3 (15.2-15.5) | 15.2 (15.0-15.4) |

|                                   |                  |                  |
|-----------------------------------|------------------|------------------|
| 2011                              | 15.5 (15.3-15.7) | 15.2 (15.0-15.4) |
| 2012                              | 15.6 (15.4-15.8) | 15.3 (15.1-15.5) |
| 2013                              | 15.6 (15.5-15.8) | 15.4 (15.2-15.6) |
| 2014                              | 15.7 (15.5-15.9) | 15.5 (15.3-15.6) |
| 2015                              | 15.7 (15.6-15.9) | 15.5 (15.4-15.7) |
| 2016                              | 15.8 (15.6-15.9) | 15.6 (15.5-15.8) |
| 2017                              | 15.8 (15.6-16.0) | 15.7 (15.5-15.9) |
| 2018                              | 15.9 (15.7-16.0) | 15.8 (15.6-16.0) |
| 2019                              | 15.9 (15.7-16.1) | 15.9 (15.6-16.2) |
| <b>Lower extremity amputation</b> |                  |                  |
| 1995                              | 5.7 (5.4-6.0)    | 3.1 (2.9-3.3)    |
| 1996                              | 5.5 (5.3-5.7)    | 2.9 (2.8-3.1)    |
| 1997                              | 5.3 (5.1-5.5)    | 2.8 (2.7-2.9)    |
| 1998                              | 5.1 (4.9-5.2)    | 2.7 (2.6-2.8)    |
| 1999                              | 4.9 (4.8-5.0)    | 2.6 (2.5-2.6)    |
| 2000                              | 4.7 (4.6-4.8)    | 2.4 (2.3-2.5)    |
| 2001                              | 4.5 (4.4-4.7)    | 2.3 (2.2-2.4)    |
| 2002                              | 4.3 (4.2-4.4)    | 2.2 (2.1-2.3)    |
| 2003                              | 4.1 (3.9-4.2)    | 2.0 (2.0-2.1)    |
| 2004                              | 3.8 (3.7-3.9)    | 1.9 (1.8-2.0)    |
| 2005                              | 3.5 (3.4-3.6)    | 1.7 (1.7-1.8)    |
| 2006                              | 3.2 (3.1-3.3)    | 1.6 (1.5-1.7)    |
| 2007                              | 3.0 (2.9-3.1)    | 1.5 (1.4-1.6)    |
| 2008                              | 2.9 (2.8-3.0)    | 1.4 (1.3-1.4)    |
| 2009                              | 2.8 (2.7-2.9)    | 1.3 (1.3-1.4)    |
| 2010                              | 2.8 (2.7-2.8)    | 1.3 (1.2-1.3)    |
| 2011                              | 2.7 (2.7-2.8)    | 1.2 (1.2-1.3)    |
| 2012                              | 2.8 (2.7-2.8)    | 1.2 (1.2-1.3)    |
| 2013                              | 2.8 (2.7-2.8)    | 1.2 (1.1-1.2)    |
| 2014                              | 2.8 (2.7-2.9)    | 1.2 (1.1-1.2)    |
| 2015                              | 2.8 (2.8-2.9)    | 1.2 (1.2-1.2)    |
| 2016                              | 2.8 (2.8-2.9)    | 1.2 (1.2-1.2)    |
| 2017                              | 2.9 (2.8-2.9)    | 1.2 (1.2-1.2)    |
| 2018                              | 2.9 (2.8-3.0)    | 1.2 (1.1-1.3)    |
| 2019                              | 2.9 (2.8-3.0)    | 1.2 (1.1-1.3)    |



**Supplementary Table S5. Hospitalizations per 1000 person-years (with 95% confidence intervals) for cardiovascular disease among people with diagnosed diabetes, 1995 to 2019, stratified by age.**

| Year                               | Age           |               |               |                  |                  |                  |                  |
|------------------------------------|---------------|---------------|---------------|------------------|------------------|------------------|------------------|
|                                    | ≤29           | 30–39         | 40–49         | 50–59            | 60–69            | 70–79            | 80+              |
| <b>Acute myocardial infarction</b> |               |               |               |                  |                  |                  |                  |
| 1995                               | 0.2 (0.1-0.5) | 2.8 (2.3-3.3) | 6.6 (6.0-7.1) | 10.9 (10.3-11.4) | 16.3 (15.7-16.9) | 24.5 (23.8-25.3) | 28.4 (27.1-29.7) |
| 1996                               | 0.2 (0.1-0.4) | 2.6 (2.2-3.1) | 6.3 (5.9-6.7) | 10.6 (10.2-11.0) | 15.9 (15.4-16.3) | 24.1 (23.5-24.7) | 29.2 (28.1-30.3) |
| 1997                               | 0.2 (0.1-0.4) | 2.5 (2.2-2.9) | 6.0 (5.7-6.4) | 10.3 (10.0-10.7) | 15.5 (15.1-15.8) | 23.7 (23.2-24.2) | 30.0 (29.0-30.9) |
| 1998                               | 0.2 (0.1-0.3) | 2.4 (2.1-2.7) | 5.8 (5.5-6.0) | 10.1 (9.8-10.4)  | 15.1 (14.8-15.4) | 23.2 (22.8-23.6) | 30.7 (30.0-31.5) |
| 1999                               | 0.2 (0.1-0.3) | 2.3 (2.0-2.5) | 5.5 (5.3-5.8) | 9.8 (9.6-10.1)   | 14.7 (14.4-15.0) | 22.8 (22.4-23.2) | 31.6 (30.9-32.3) |
| 2000                               | 0.2 (0.1-0.3) | 2.2 (1.9-2.4) | 5.3 (5.1-5.5) | 9.6 (9.3-9.8)    | 14.3 (14.0-14.6) | 22.4 (22.0-22.7) | 32.4 (31.7-33.1) |
| 2001                               | 0.2 (0.1-0.4) | 2.0 (1.8-2.3) | 5.1 (4.8-5.3) | 9.3 (9.0-9.5)    | 13.9 (13.5-14.2) | 21.8 (21.4-22.2) | 32.9 (32.1-33.7) |
| 2002                               | 0.2 (0.1-0.4) | 1.9 (1.7-2.2) | 4.8 (4.6-5.1) | 8.9 (8.6-9.1)    | 13.2 (12.9-13.6) | 21.0 (20.6-21.5) | 32.8 (31.9-33.6) |
| 2003                               | 0.2 (0.1-0.4) | 1.7 (1.5-2.0) | 4.5 (4.3-4.8) | 8.3 (8.1-8.6)    | 12.4 (12.1-12.7) | 19.9 (19.5-20.3) | 31.8 (31.0-32.6) |
| 2004                               | 0.2 (0.1-0.3) | 1.6 (1.4-1.8) | 4.2 (4.1-4.5) | 7.7 (7.5-7.9)    | 11.4 (11.2-11.7) | 18.5 (18.2-18.8) | 29.8 (29.1-30.4) |
| 2005                               | 0.2 (0.1-0.3) | 1.4 (1.2-1.6) | 4.0 (3.8-4.2) | 7.0 (6.8-7.2)    | 10.4 (10.1-10.6) | 17.0 (16.7-17.3) | 27.3 (26.8-27.9) |
| 2006                               | 0.2 (0.1-0.3) | 1.3 (1.1-1.5) | 3.7 (3.5-3.9) | 6.4 (6.2-6.6)    | 9.4 (9.2-9.7)    | 15.5 (15.2-15.9) | 24.9 (24.4-25.5) |
| 2007                               | 0.1 (0.1-0.3) | 1.2 (1.0-1.4) | 3.6 (3.4-3.8) | 5.9 (5.7-6.1)    | 8.7 (8.5-8.9)    | 14.3 (14.0-14.7) | 23.0 (22.4-23.6) |
| 2008                               | 0.1 (0.1-0.2) | 1.2 (1.1-1.4) | 3.5 (3.3-3.7) | 5.6 (5.4-5.8)    | 8.3 (8.0-8.5)    | 13.4 (13.1-13.7) | 21.6 (21.1-22.1) |
| 2009                               | 0.1 (0.1-0.2) | 1.3 (1.2-1.5) | 3.4 (3.3-3.6) | 5.5 (5.3-5.6)    | 8.0 (7.8-8.2)    | 12.7 (12.5-12.9) | 20.7 (20.3-21.1) |
| 2010                               | 0.1 (0.1-0.2) | 1.4 (1.2-1.6) | 3.4 (3.3-3.6) | 5.4 (5.2-5.5)    | 7.8 (7.7-8.0)    | 12.1 (11.9-12.4) | 20.0 (19.6-20.3) |
| 2011                               | 0.1 (0.1-0.2) | 1.5 (1.3-1.7) | 3.4 (3.2-3.6) | 5.3 (5.2-5.5)    | 7.7 (7.6-7.9)    | 11.7 (11.5-11.9) | 19.3 (18.9-19.7) |
| 2012                               | 0.1 (0.1-0.2) | 1.5 (1.3-1.8) | 3.4 (3.2-3.6) | 5.3 (5.1-5.4)    | 7.6 (7.5-7.8)    | 11.3 (11.1-11.5) | 18.6 (18.3-19.0) |
| 2013                               | 0.1 (0.1-0.2) | 1.6 (1.4-1.8) | 3.3 (3.2-3.5) | 5.2 (5.1-5.4)    | 7.5 (7.3-7.6)    | 10.9 (10.7-11.2) | 17.9 (17.6-18.3) |
| 2014                               | 0.1 (0.1-0.2) | 1.5 (1.4-1.7) | 3.3 (3.2-3.4) | 5.2 (5.1-5.3)    | 7.3 (7.2-7.5)    | 10.6 (10.4-10.8) | 17.2 (16.9-17.5) |
| 2015                               | 0.1 (0.1-0.2) | 1.5 (1.4-1.7) | 3.3 (3.1-3.4) | 5.2 (5.1-5.3)    | 7.2 (7.1-7.3)    | 10.3 (10.1-10.5) | 16.4 (16.2-16.7) |
| 2016                               | 0.1 (0.1-0.2) | 1.5 (1.3-1.6) | 3.2 (3.1-3.3) | 5.1 (5.0-5.2)    | 7.1 (6.9-7.2)    | 10.0 (9.8-10.1)  | 15.7 (15.5-16.0) |
| 2017                               | 0.1 (0.1-0.2) | 1.5 (1.3-1.6) | 3.2 (3.0-3.3) | 5.1 (4.9-5.2)    | 6.9 (6.8-7.1)    | 9.7 (9.5-9.9)    | 15.0 (14.7-15.3) |
| 2018                               | 0.1 (0.1-0.2) | 1.4 (1.2-1.7) | 3.1 (2.9-3.3) | 5.0 (4.9-5.2)    | 6.8 (6.6-7.0)    | 9.4 (9.2-9.6)    | 14.4 (14.0-14.7) |
| 2019                               | 0.1 (0.1-0.2) | 1.4 (1.2-1.7) | 3.1 (2.9-3.3) | 5.0 (4.8-5.2)    | 6.7 (6.5-6.9)    | 9.1 (8.9-9.4)    | 13.7 (13.4-14.1) |
| <b>Stroke</b>                      |               |               |               |                  |                  |                  |                  |
| 1995                               | 0.0 (0.0-0.1) | 0.5 (0.3-0.7) | 1.8 (1.6-2.1) | 4.7 (4.3-5.0)    | 10.2 (9.7-10.7)  | 18.9 (18.2-19.6) | 30.7 (29.3-32.1) |
| 1996                               | 0.0 (0.0-0.1) | 0.5 (0.4-0.7) | 1.7 (1.5-2.0) | 4.3 (4.0-4.6)    | 9.3 (9.0-9.7)    | 17.5 (17.0-18.0) | 28.6 (27.5-29.7) |
| 1997                               | 0.0 (0.0-0.1) | 0.5 (0.4-0.6) | 1.6 (1.5-1.8) | 3.9 (3.7-4.1)    | 8.5 (8.3-8.8)    | 16.2 (15.8-16.6) | 26.7 (25.9-27.5) |
| 1998                               | 0.1 (0.0-0.1) | 0.5 (0.4-0.6) | 1.5 (1.4-1.7) | 3.6 (3.4-3.8)    | 7.8 (7.6-8.0)    | 15.0 (14.7-15.3) | 24.9 (24.3-25.6) |
| 1999                               | 0.1 (0.0-0.1) | 0.5 (0.4-0.6) | 1.4 (1.3-1.6) | 3.3 (3.2-3.5)    | 7.1 (6.9-7.3)    | 13.9 (13.6-14.2) | 23.2 (22.7-23.8) |

|                      |               |               |               |                  |                  |                  |                  |
|----------------------|---------------|---------------|---------------|------------------|------------------|------------------|------------------|
| 2000                 | 0.1 (0.0-0.1) | 0.5 (0.4-0.7) | 1.4 (1.2-1.5) | 3.0 (2.9-3.2)    | 6.5 (6.3-6.7)    | 12.8 (12.5-13.1) | 21.7 (21.1-22.2) |
| 2001                 | 0.1 (0.0-0.2) | 0.5 (0.4-0.7) | 1.3 (1.2-1.4) | 2.8 (2.7-3.0)    | 6.0 (5.8-6.2)    | 11.8 (11.5-12.1) | 20.2 (19.6-20.8) |
| 2002                 | 0.1 (0.0-0.2) | 0.5 (0.4-0.7) | 1.2 (1.1-1.4) | 2.6 (2.4-2.7)    | 5.4 (5.2-5.6)    | 10.9 (10.6-11.2) | 18.7 (18.1-19.3) |
| 2003                 | 0.1 (0.1-0.2) | 0.5 (0.4-0.7) | 1.2 (1.0-1.3) | 2.4 (2.3-2.5)    | 5.0 (4.8-5.1)    | 9.9 (9.6-10.2)   | 17.2 (16.7-17.7) |
| 2004                 | 0.1 (0.1-0.2) | 0.5 (0.4-0.6) | 1.1 (1.0-1.2) | 2.2 (2.1-2.3)    | 4.5 (4.4-4.7)    | 8.9 (8.7-9.1)    | 15.7 (15.3-16.1) |
| 2005                 | 0.1 (0.1-0.2) | 0.5 (0.4-0.6) | 1.0 (0.9-1.1) | 2.1 (2.0-2.2)    | 4.1 (4.0-4.3)    | 8.0 (7.8-8.2)    | 14.3 (13.9-14.7) |
| 2006                 | 0.1 (0.1-0.2) | 0.4 (0.3-0.6) | 1.0 (0.9-1.1) | 2.0 (1.9-2.1)    | 3.8 (3.6-3.9)    | 7.2 (7.0-7.5)    | 13.1 (12.7-13.5) |
| 2007                 | 0.1 (0.0-0.3) | 0.4 (0.3-0.6) | 0.9 (0.8-1.1) | 1.9 (1.8-2.0)    | 3.5 (3.4-3.7)    | 6.6 (6.4-6.8)    | 12.1 (11.7-12.5) |
| 2008                 | 0.1 (0.0-0.2) | 0.4 (0.3-0.5) | 0.9 (0.8-1.0) | 1.8 (1.7-1.9)    | 3.3 (3.2-3.4)    | 6.1 (6.0-6.3)    | 11.4 (11.0-11.7) |
| 2009                 | 0.1 (0.0-0.2) | 0.4 (0.3-0.5) | 0.9 (0.8-1.0) | 1.7 (1.6-1.8)    | 3.1 (3.0-3.2)    | 5.8 (5.7-6.0)    | 10.9 (10.6-11.2) |
| 2010                 | 0.1 (0.0-0.1) | 0.4 (0.3-0.5) | 0.9 (0.8-0.9) | 1.7 (1.6-1.8)    | 3.0 (2.9-3.1)    | 5.6 (5.4-5.7)    | 10.5 (10.3-10.8) |
| 2011                 | 0.1 (0.0-0.2) | 0.4 (0.3-0.5) | 0.9 (0.8-0.9) | 1.7 (1.6-1.7)    | 2.9 (2.8-3.0)    | 5.4 (5.2-5.5)    | 10.3 (10.1-10.6) |
| 2012                 | 0.1 (0.0-0.2) | 0.4 (0.3-0.6) | 0.9 (0.8-1.0) | 1.7 (1.6-1.7)    | 2.8 (2.7-2.9)    | 5.3 (5.1-5.4)    | 10.2 (9.9-10.5)  |
| 2013                 | 0.1 (0.0-0.2) | 0.5 (0.4-0.6) | 0.9 (0.8-1.0) | 1.7 (1.6-1.8)    | 2.8 (2.7-2.9)    | 5.2 (5.1-5.3)    | 10.1 (9.9-10.4)  |
| 2014                 | 0.1 (0.0-0.1) | 0.5 (0.4-0.6) | 0.9 (0.8-1.0) | 1.7 (1.6-1.8)    | 2.9 (2.8-2.9)    | 5.1 (5.0-5.3)    | 10.1 (9.9-10.3)  |
| 2015                 | 0.1 (0.1-0.1) | 0.5 (0.4-0.6) | 0.9 (0.9-1.0) | 1.7 (1.7-1.8)    | 2.9 (2.8-3.0)    | 5.1 (5.0-5.2)    | 10.1 (9.9-10.3)  |
| 2016                 | 0.1 (0.1-0.1) | 0.5 (0.4-0.6) | 1.0 (0.9-1.0) | 1.8 (1.7-1.8)    | 2.9 (2.8-3.0)    | 5.1 (5.0-5.2)    | 10.0 (9.9-10.2)  |
| 2017                 | 0.1 (0.1-0.2) | 0.5 (0.5-0.7) | 1.0 (0.9-1.1) | 1.8 (1.7-1.9)    | 2.9 (2.9-3.0)    | 5.0 (4.9-5.1)    | 10.0 (9.8-10.2)  |
| 2018                 | 0.1 (0.1-0.2) | 0.6 (0.5-0.7) | 1.0 (0.9-1.2) | 1.9 (1.8-2.0)    | 3.0 (2.9-3.1)    | 5.0 (4.8-5.1)    | 10.0 (9.8-10.3)  |
| 2019                 | 0.1 (0.0-0.2) | 0.6 (0.5-0.8) | 1.1 (1.0-1.2) | 1.9 (1.8-2.0)    | 3.0 (2.9-3.1)    | 5.0 (4.8-5.1)    | 10.0 (9.7-10.3)  |
| <b>Heart failure</b> |               |               |               |                  |                  |                  |                  |
| 1995                 | 0.5 (0.3-0.9) | 2.4 (2.0-3.0) | 4.8 (4.4-5.4) | 13.0 (12.3-13.7) | 27.3 (26.5-28.2) | 51.2 (50.0-52.4) | 90.0 (87.5-92.6) |
| 1996                 | 0.5 (0.3-0.8) | 2.3 (1.9-2.8) | 4.6 (4.2-5.1) | 12.4 (11.9-13.0) | 26.4 (25.7-27.0) | 49.7 (48.7-50.8) | 87.5 (85.5-89.6) |
| 1997                 | 0.5 (0.3-0.7) | 2.2 (1.9-2.6) | 4.4 (4.1-4.8) | 11.9 (11.5-12.4) | 25.4 (24.9-26.0) | 48.3 (47.5-49.2) | 85.1 (83.4-86.8) |
| 1998                 | 0.5 (0.3-0.7) | 2.1 (1.8-2.4) | 4.3 (4.0-4.5) | 11.4 (11.1-11.8) | 24.5 (24.1-25.0) | 47.0 (46.3-47.7) | 82.7 (81.4-84.1) |
| 1999                 | 0.5 (0.3-0.6) | 2.0 (1.7-2.2) | 4.1 (3.9-4.3) | 11.0 (10.7-11.3) | 23.7 (23.3-24.1) | 45.7 (45.0-46.3) | 80.4 (79.2-81.6) |
| 2000                 | 0.5 (0.3-0.7) | 1.9 (1.6-2.1) | 3.9 (3.7-4.2) | 10.5 (10.2-10.8) | 22.8 (22.4-23.3) | 44.3 (43.7-45.0) | 78.1 (76.9-79.4) |
| 2001                 | 0.5 (0.3-0.7) | 1.8 (1.5-2.0) | 3.7 (3.5-4.0) | 10.0 (9.7-10.3)  | 21.8 (21.4-22.3) | 42.8 (42.1-43.4) | 75.5 (74.2-76.8) |
| 2002                 | 0.5 (0.3-0.7) | 1.6 (1.4-1.9) | 3.5 (3.3-3.8) | 9.4 (9.1-9.7)    | 20.6 (20.2-21.1) | 40.7 (40.1-41.4) | 72.3 (71.0-73.6) |
| 2003                 | 0.5 (0.3-0.7) | 1.5 (1.3-1.7) | 3.3 (3.1-3.5) | 8.7 (8.4-9.0)    | 19.1 (18.7-19.5) | 38.1 (37.5-38.7) | 68.2 (67.0-69.4) |
| 2004                 | 0.4 (0.3-0.6) | 1.3 (1.1-1.5) | 3.0 (2.8-3.2) | 7.8 (7.6-8.1)    | 17.2 (16.9-17.6) | 34.8 (34.3-35.3) | 63.3 (62.3-64.3) |
| 2005                 | 0.4 (0.3-0.6) | 1.1 (1.0-1.3) | 2.7 (2.6-2.9) | 7.0 (6.8-7.2)    | 15.4 (15.1-15.7) | 31.5 (31.0-32.0) | 58.3 (57.4-59.2) |
| 2006                 | 0.4 (0.3-0.6) | 1.0 (0.9-1.2) | 2.5 (2.3-2.7) | 6.3 (6.0-6.5)    | 13.8 (13.5-14.1) | 28.5 (28.0-29.0) | 53.9 (52.9-54.8) |
| 2007                 | 0.4 (0.3-0.7) | 1.0 (0.8-1.2) | 2.3 (2.1-2.5) | 5.7 (5.5-6.0)    | 12.6 (12.3-12.9) | 26.3 (25.8-26.8) | 50.6 (49.6-51.5) |
| 2008                 | 0.4 (0.3-0.7) | 0.9 (0.8-1.1) | 2.2 (2.0-2.4) | 5.4 (5.2-5.6)    | 11.8 (11.6-12.1) | 24.9 (24.5-25.4) | 48.6 (47.8-49.5) |
| 2009                 | 0.4 (0.3-0.6) | 1.0 (0.8-1.1) | 2.2 (2.0-2.3) | 5.2 (5.0-5.4)    | 11.4 (11.2-11.7) | 24.1 (23.8-24.5) | 47.7 (47.0-48.4) |
| 2010                 | 0.4 (0.3-0.6) | 1.0 (0.9-1.2) | 2.2 (2.0-2.3) | 5.1 (4.9-5.2)    | 11.2 (11.0-11.4) | 23.7 (23.4-24.1) | 47.5 (46.9-48.2) |

|                                   |               |               |               |               |                  |                  |                  |
|-----------------------------------|---------------|---------------|---------------|---------------|------------------|------------------|------------------|
| 2011                              | 0.4 (0.3-0.6) | 1.1 (0.9-1.3) | 2.2 (2.0-2.3) | 5.0 (4.9-5.2) | 11.1 (10.8-11.3) | 23.4 (23.0-23.8) | 47.7 (47.0-48.4) |
| 2012                              | 0.4 (0.3-0.6) | 1.1 (1.0-1.4) | 2.2 (2.0-2.3) | 5.0 (4.8-5.1) | 10.9 (10.7-11.2) | 23.1 (22.7-23.5) | 47.9 (47.3-48.6) |
| 2013                              | 0.4 (0.3-0.6) | 1.2 (1.0-1.4) | 2.2 (2.1-2.3) | 4.9 (4.8-5.1) | 10.8 (10.6-11.0) | 22.7 (22.4-23.1) | 48.2 (47.6-48.9) |
| 2014                              | 0.4 (0.3-0.5) | 1.2 (1.1-1.4) | 2.2 (2.1-2.3) | 4.9 (4.7-5.0) | 10.7 (10.5-10.9) | 22.3 (22.0-22.6) | 48.6 (48.0-49.1) |
| 2015                              | 0.4 (0.3-0.5) | 1.2 (1.1-1.4) | 2.2 (2.1-2.3) | 4.8 (4.7-5.0) | 10.5 (10.3-10.7) | 21.9 (21.7-22.2) | 48.9 (48.4-49.4) |
| 2016                              | 0.4 (0.3-0.5) | 1.3 (1.1-1.4) | 2.2 (2.1-2.4) | 4.8 (4.7-4.9) | 10.4 (10.2-10.5) | 21.5 (21.3-21.8) | 49.3 (48.8-49.8) |
| 2017                              | 0.4 (0.3-0.5) | 1.3 (1.1-1.5) | 2.3 (2.1-2.4) | 4.7 (4.6-4.9) | 10.2 (10.0-10.4) | 21.2 (20.9-21.4) | 49.6 (49.1-50.2) |
| 2018                              | 0.4 (0.2-0.5) | 1.3 (1.1-1.5) | 2.3 (2.1-2.5) | 4.7 (4.5-4.9) | 10.1 (9.9-10.3)  | 20.8 (20.4-21.1) | 50.0 (49.3-50.6) |
| 2019                              | 0.3 (0.2-0.5) | 1.3 (1.1-1.6) | 2.3 (2.1-2.5) | 4.6 (4.4-4.9) | 10.0 (9.7-10.2)  | 20.4 (20.0-20.8) | 50.3 (49.5-51.1) |
| <b>Lower extremity amputation</b> |               |               |               |               |                  |                  |                  |
| 1995                              | 0.4 (0.2-0.8) | 1.6 (1.3-2.1) | 2.5 (2.2-2.9) | 3.5 (3.2-3.8) | 5.1 (4.7-5.4)    | 6.5 (6.0-6.9)    | 6.0 (5.5-6.7)    |
| 1996                              | 0.4 (0.2-0.6) | 1.6 (1.3-1.9) | 2.4 (2.1-2.7) | 3.4 (3.1-3.6) | 4.9 (4.6-5.1)    | 6.2 (5.8-6.5)    | 5.9 (5.4-6.4)    |
| 1997                              | 0.3 (0.2-0.5) | 1.5 (1.2-1.8) | 2.3 (2.1-2.5) | 3.3 (3.1-3.5) | 4.7 (4.5-4.9)    | 5.9 (5.6-6.1)    | 5.7 (5.3-6.1)    |
| 1998                              | 0.3 (0.2-0.4) | 1.4 (1.2-1.7) | 2.2 (2.0-2.4) | 3.2 (3.0-3.3) | 4.5 (4.3-4.7)    | 5.6 (5.4-5.8)    | 5.5 (5.2-5.9)    |
| 1999                              | 0.2 (0.1-0.3) | 1.4 (1.2-1.6) | 2.1 (1.9-2.3) | 3.1 (2.9-3.2) | 4.3 (4.1-4.5)    | 5.3 (5.1-5.5)    | 5.4 (5.1-5.7)    |
| 2000                              | 0.2 (0.1-0.3) | 1.3 (1.1-1.5) | 2.0 (1.8-2.2) | 3.0 (2.8-3.1) | 4.1 (4.0-4.3)    | 5.0 (4.9-5.2)    | 5.2 (4.9-5.5)    |
| 2001                              | 0.2 (0.1-0.3) | 1.3 (1.0-1.5) | 1.9 (1.7-2.1) | 2.9 (2.7-3.0) | 3.9 (3.8-4.1)    | 4.8 (4.6-5.0)    | 5.1 (4.7-5.4)    |
| 2002                              | 0.2 (0.1-0.3) | 1.2 (1.0-1.5) | 1.8 (1.6-2.0) | 2.8 (2.6-2.9) | 3.7 (3.5-3.9)    | 4.5 (4.3-4.7)    | 4.8 (4.5-5.2)    |
| 2003                              | 0.2 (0.1-0.3) | 1.2 (1.0-1.4) | 1.8 (1.6-1.9) | 2.7 (2.5-2.8) | 3.5 (3.3-3.6)    | 4.2 (4.0-4.4)    | 4.5 (4.2-4.8)    |
| 2004                              | 0.2 (0.1-0.3) | 1.1 (0.9-1.3) | 1.7 (1.6-1.9) | 2.5 (2.4-2.7) | 3.2 (3.0-3.3)    | 3.8 (3.7-4.0)    | 4.1 (3.9-4.4)    |
| 2005                              | 0.2 (0.1-0.3) | 1.1 (0.9-1.3) | 1.7 (1.5-1.8) | 2.4 (2.3-2.5) | 2.9 (2.7-3.0)    | 3.5 (3.3-3.6)    | 3.7 (3.5-4.0)    |
| 2006                              | 0.2 (0.1-0.4) | 1.0 (0.8-1.2) | 1.6 (1.5-1.8) | 2.3 (2.1-2.4) | 2.6 (2.5-2.7)    | 3.1 (3.0-3.3)    | 3.4 (3.2-3.6)    |
| 2007                              | 0.3 (0.2-0.5) | 1.0 (0.8-1.2) | 1.6 (1.4-1.7) | 2.2 (2.0-2.3) | 2.4 (2.3-2.5)    | 2.9 (2.7-3.0)    | 3.1 (2.8-3.3)    |
| 2008                              | 0.3 (0.2-0.5) | 1.0 (0.8-1.2) | 1.5 (1.4-1.7) | 2.1 (2.0-2.2) | 2.3 (2.2-2.4)    | 2.7 (2.5-2.8)    | 2.8 (2.6-3.0)    |
| 2009                              | 0.3 (0.2-0.4) | 0.9 (0.8-1.1) | 1.5 (1.4-1.6) | 2.1 (2.0-2.2) | 2.2 (2.1-2.3)    | 2.5 (2.4-2.6)    | 2.6 (2.5-2.8)    |
| 2010                              | 0.2 (0.2-0.4) | 0.9 (0.8-1.1) | 1.4 (1.3-1.6) | 2.0 (1.9-2.1) | 2.2 (2.1-2.3)    | 2.4 (2.3-2.5)    | 2.5 (2.4-2.6)    |
| 2011                              | 0.2 (0.2-0.3) | 0.9 (0.8-1.1) | 1.4 (1.3-1.5) | 2.0 (1.9-2.1) | 2.2 (2.1-2.3)    | 2.3 (2.2-2.4)    | 2.4 (2.3-2.6)    |
| 2012                              | 0.2 (0.1-0.3) | 0.9 (0.8-1.1) | 1.4 (1.3-1.6) | 2.0 (1.9-2.1) | 2.2 (2.1-2.3)    | 2.3 (2.2-2.4)    | 2.3 (2.2-2.5)    |
| 2013                              | 0.2 (0.1-0.3) | 1.0 (0.8-1.1) | 1.4 (1.3-1.6) | 2.0 (1.9-2.1) | 2.2 (2.1-2.3)    | 2.3 (2.2-2.4)    | 2.3 (2.2-2.4)    |
| 2014                              | 0.2 (0.1-0.3) | 1.0 (0.9-1.2) | 1.5 (1.4-1.6) | 2.1 (2.0-2.1) | 2.3 (2.2-2.4)    | 2.2 (2.2-2.3)    | 2.3 (2.1-2.4)    |
| 2015                              | 0.2 (0.1-0.3) | 1.1 (0.9-1.2) | 1.5 (1.4-1.6) | 2.1 (2.0-2.2) | 2.3 (2.2-2.4)    | 2.2 (2.2-2.3)    | 2.2 (2.1-2.3)    |
| 2016                              | 0.2 (0.1-0.3) | 1.1 (1.0-1.3) | 1.6 (1.5-1.7) | 2.1 (2.0-2.2) | 2.3 (2.3-2.4)    | 2.2 (2.2-2.3)    | 2.2 (2.1-2.3)    |
| 2017                              | 0.2 (0.1-0.3) | 1.2 (1.0-1.4) | 1.6 (1.5-1.8) | 2.1 (2.0-2.2) | 2.4 (2.3-2.5)    | 2.2 (2.1-2.3)    | 2.2 (2.1-2.3)    |
| 2018                              | 0.2 (0.1-0.3) | 1.3 (1.1-1.5) | 1.7 (1.6-1.9) | 2.1 (2.0-2.2) | 2.4 (2.3-2.5)    | 2.2 (2.1-2.3)    | 2.1 (2.0-2.3)    |
| 2019                              | 0.2 (0.1-0.3) | 1.3 (1.1-1.6) | 1.8 (1.6-2.0) | 2.1 (2.0-2.3) | 2.5 (2.3-2.6)    | 2.2 (2.1-2.3)    | 2.1 (2.0-2.3)    |
